# Supplementary material
Source: PubMed Central journal article supplement (PMC10957505)

Figure S1

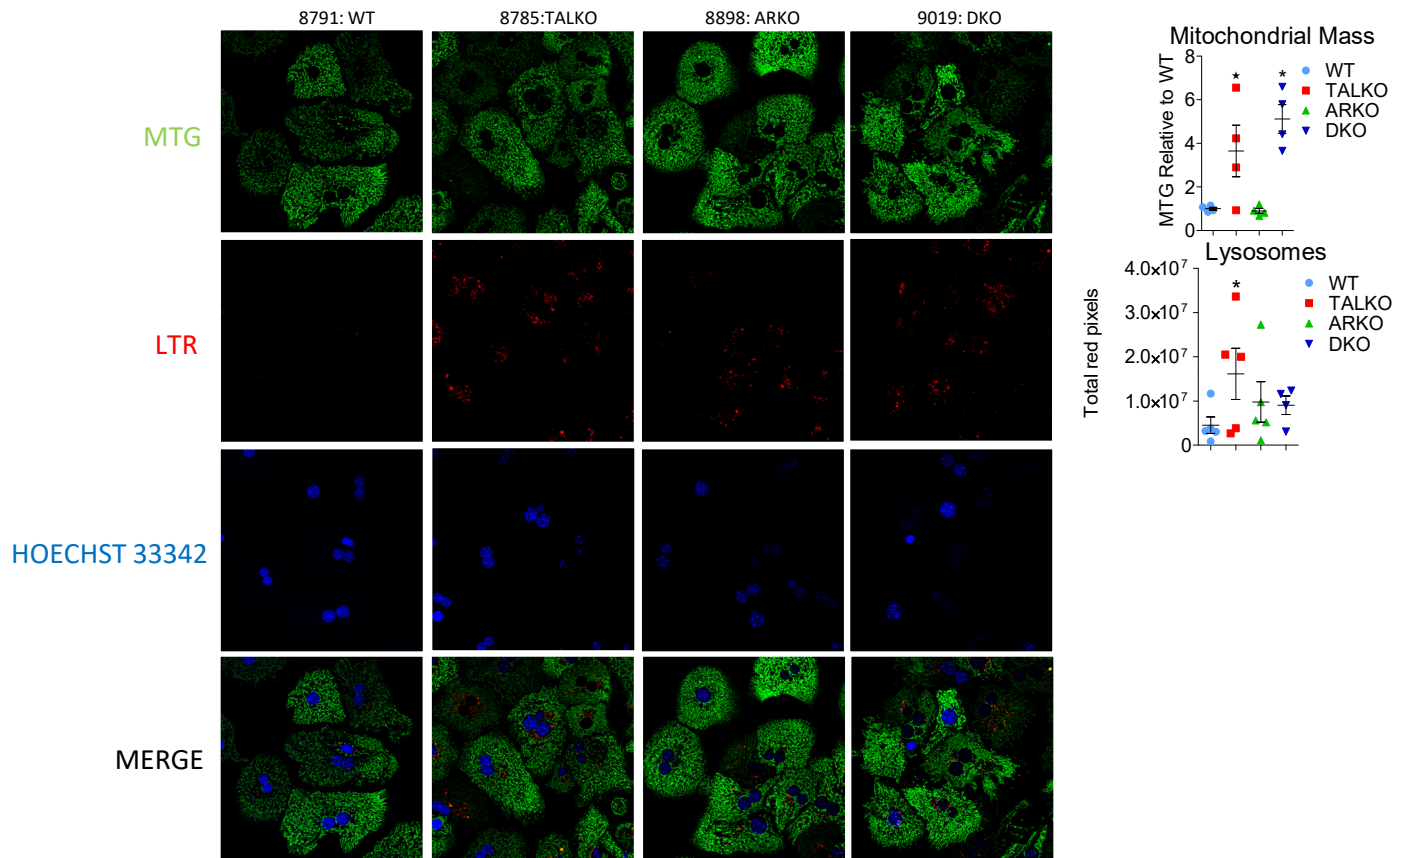

**Figure S2**

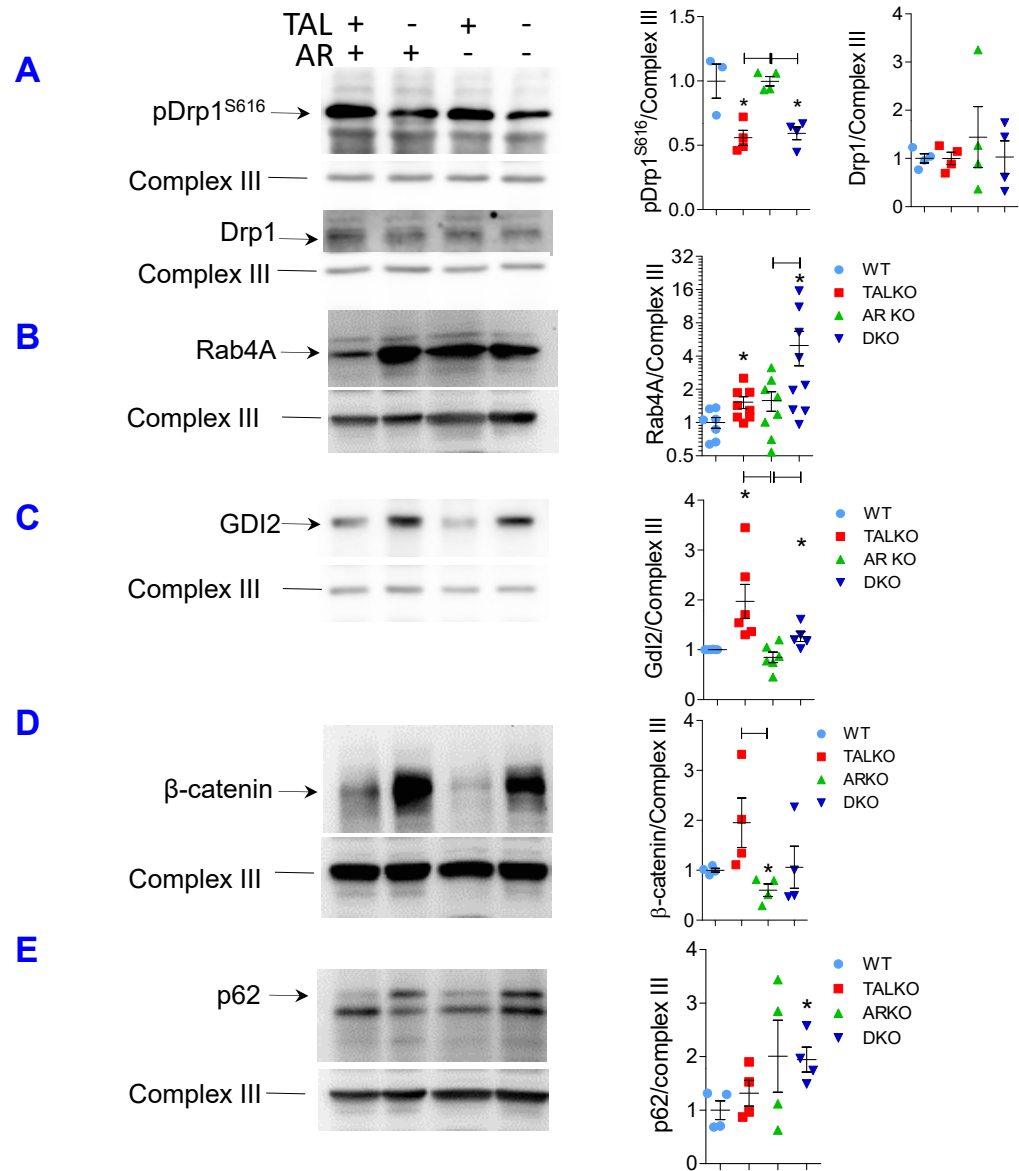

Supplement: NIHMS1939451-supplement-1.pdf [file NIHMS1939451-supplement-1.pdf]
